# Supplementary material for: Ti-containing hierarchical Beta with highly active sites for deep desulfurization of fuels under mild conditions
Source: Royal Society of Chemistry journal article supplement (doi:10.1039/c6cy01389a), 2016-01-01
Supplement: c6cy01389a1.pdf [file c6cy01389a1.pdf]

## Electronic Supplementary Information

### **Ti-containing hierarchical Beta with highly active sites for deep desulfurization of fuels under mild conditions**

Kunyue Leng<sup>a</sup>, Xiaolin Li<sup>a</sup>, Gan Ye<sup>a</sup>, Yunchen Du<sup>a</sup>, Yinyong Sun<sup>a,\*</sup>, Wei Xu<sup>b</sup>

*<sup>a</sup>MIIT Key Laboratory of Critical Materials Technology for New Energy Conversion and Storage, School of Chemistry and Chemical Engineering, Harbin Institute of Technology, Harbin, 150001, China.*

*<sup>b</sup>State Key Lab of Inorganic Synthesis and Preparative Chemistry, College of Chemistry, Jilin University, Changchun, 130012, China.*

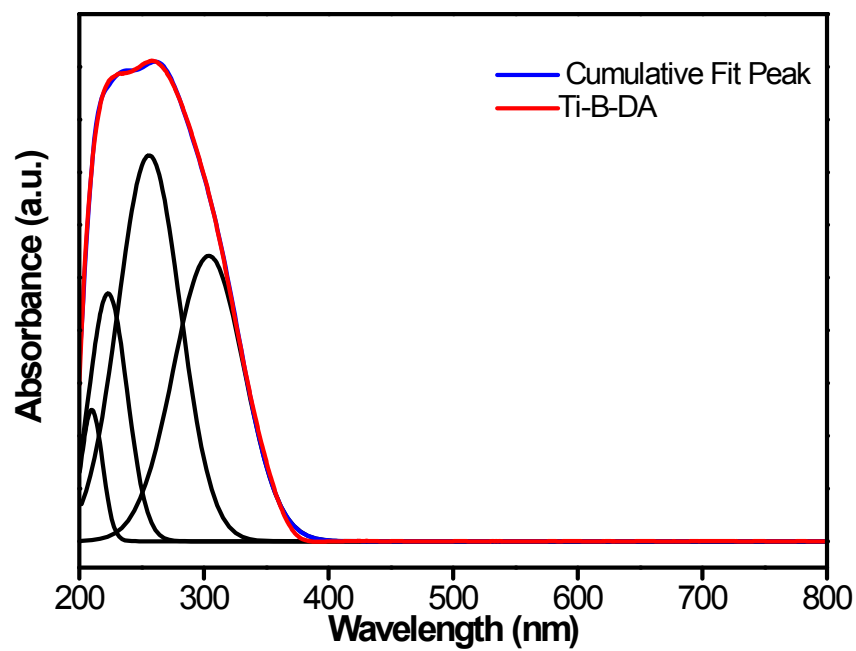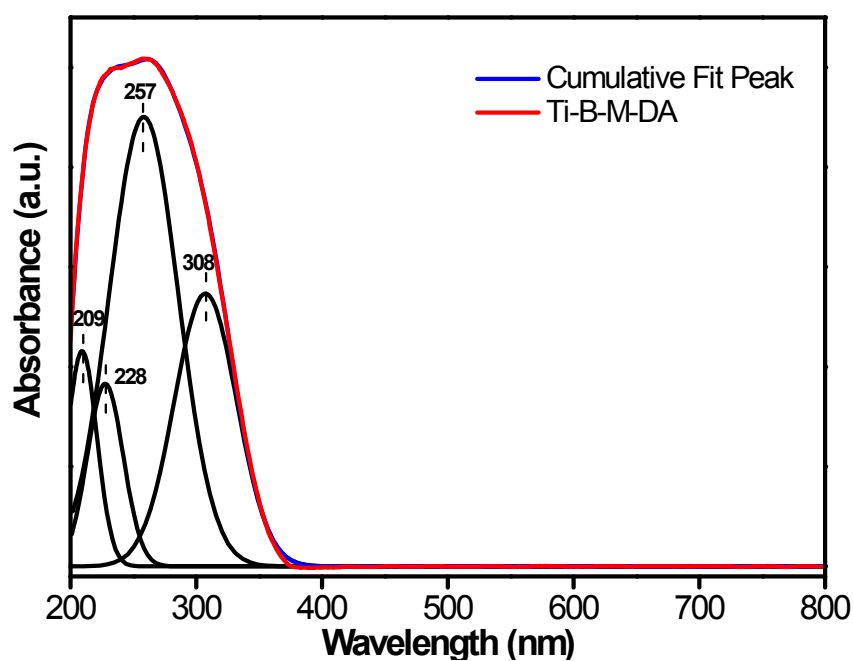

Figure S1. UV-vis spectra of Ti-B-DA and Ti-B-M-DA with their fit decomposition curves.

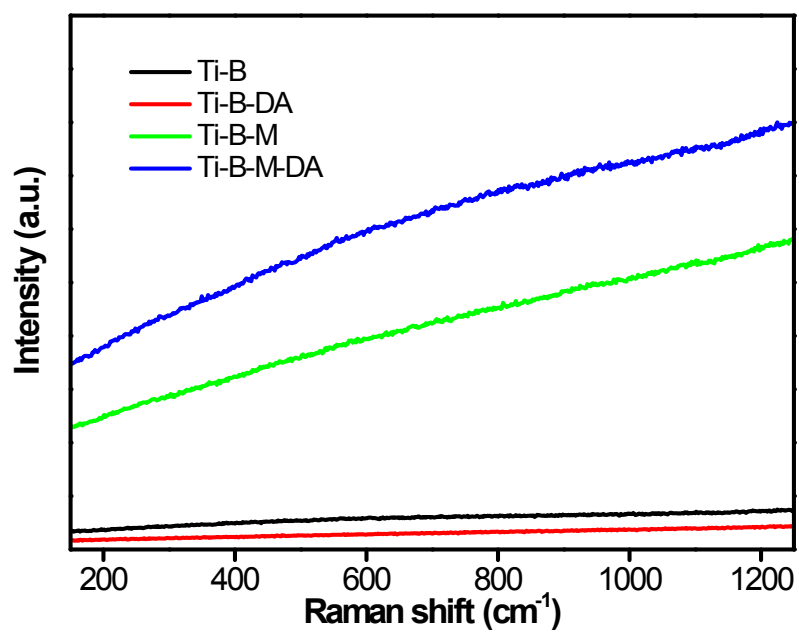

Figure S2. Raman spectra of various samples.

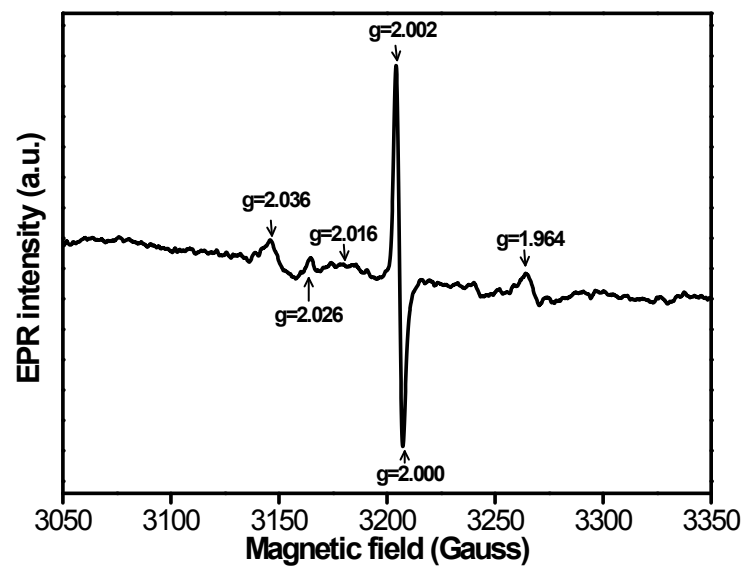

Figure S3. EPR spectrum of Ti-M-B-DA containing TBHP.
